# Supplementary material
Source: HighWire-hosted journal article supplement (http://www.ajnr.org/highwire/filestream/52538/field_highwire_adjunct_files/0/4164_table.pdf)
Supplement: 4164_table.pdf [file 4164_table.pdf]

**On-line Table: TRICKS, DSA findings, and treatment of patients with SDAVF (type I)**

| Age (yr) | Sex | Side and Level of Feeding Vessel    |                                                            | Treatment    | Classification |
|----------|-----|-------------------------------------|------------------------------------------------------------|--------------|----------------|
|          |     | TRICKS                              | Angiogram                                                  |              |                |
| 76       | F   | R L2                                | R L2                                                       | Surgery      | I              |
| 64       | F   | L T12                               | L T12                                                      | Surgery      | I              |
| 59       | F   | T8/T9, no side identified           | L T9                                                       | Surgery      | I              |
| 54       | M   | L T9                                | L T8 and T9                                                | Surgery      | I              |
| 80       | F   | L T12                               | L L1                                                       | Surgery      | I              |
| 79       | M   | R T12                               | R T12                                                      | Surgery      | I              |
| 67       | M   | L L1/L2                             | L L1                                                       | Surgery      | I              |
| 58       | M   | L T5                                | L T5                                                       | Surgery      | I              |
| 68       | F   | T10/T11, no side identified         | L T11                                                      | Surgery      | I              |
| 59       | M   | R T12                               | R L1                                                       | Surgery      | I              |
| 69       | F   | L T8                                | L T8                                                       | Surgery      | I              |
| 60       | M   | R T12                               | R T12                                                      | Surgery      | I              |
| 76       | F   | T10/T11, no side identified         | L T12                                                      | Surgery      | I              |
| 69       | M   | R T8                                | R T8                                                       | Surgery      | I              |
| 56       | M   | R T9                                | R T9                                                       | Surgery      | I              |
| 60       | M   | R T7                                | R T7                                                       | Surgery      | I              |
| 70       | F   | R T11                               | R T11                                                      | Surgery      | I              |
| 72       | M   | R T11                               | R T11                                                      | Surgery      | I              |
| 60       | F   | L T11/T12                           | L L2                                                       | Surgery      | I              |
| 69       | M   | R T10 and L T11                     | R T12                                                      | Surgery      | I              |
| 65       | F   | L L1 and R T10                      | R T6 and L T8                                              | Surgery      | Ib             |
| 51       | M   | L T11                               | R S1                                                       | Surgery      | I              |
| 65       | M   | R T9                                | R T9                                                       | Surgery      | I              |
| 75       | M   | R T4                                | R T4                                                       | Surgery      | I              |
| 76       | F   | R T8                                | R T8                                                       | Surgery      | I              |
| 59       | M   | L T7/T8                             | L T6                                                       | Surgery      | I              |
| 48       | M   | Upper mid-thoracic                  | L T6                                                       | Surgery      | I              |
| 82       | F   | R T6–T8                             | L T6                                                       | Surgery      | I              |
| 83       | M   | L T5                                | L T5                                                       | Surgery      | I              |
| 64       | M   | R T5                                | R T5                                                       | Surgery      | I              |
| 75       | F   | L T6                                | Unsuccessful                                               | Surgery      | I              |
| 58       | F   | SVM but no level or side identified | R L3                                                       | Surgery      | I              |
| 44       | F   | Lower cervical                      | Posterior fossa, L occipital and middle meningeal branches | Embolization | I              |

**Note:**—L indicates left; R, right.
